# Supplementary material for: Is Indonesia achieving universal health coverage? Secondary analysis of national data on insurance coverage, health spending and service availability
Source: PubMed Central journal article supplement — BMJ Open. 2021 Oct 3;11(10):e050565. doi: 10.1136/bmjopen-2021-050565 (PMC8491299; doi:10.1136/bmjopen-2021-050565), 2021-10-03
Supplement: bmjopen-2021-050565supp001.pdf [file bmjopen-2021-050565supp001.pdf]

Supplementary material to Pratiwi et al.

Supplementary file 1: Information about the sources

## Supplementary file 1: Data included in the merged datasets

| Data set acronym | Source            | Years    | Level of record | Representative level | Number of records | Key information                                   |
|------------------|-------------------|----------|-----------------|----------------------|-------------------|---------------------------------------------------|
| SUSENAS          | BPS               | 2018     | Individual      | District             | 1,131,825         | Insurance status, service use, spending on health |
| PoDes            | BPS               | 2018     | Village         | Village (census)     | 83,931            | Service availability                              |
| IPKM             | MoH/<br>RisKesDas | 2018     | District        | District             | 514               | Health status                                     |
| BPJS             | BPJS              | End 2017 | District        | District             | 514               | Insurance premiums, insurance claims              |
| GIS data         | BPS               | 2017     | District        | District, Province   | 514               | Administrative boundaries                         |

SUSENAS=Survey Sosial Ekonomi Nasional, or National Social and Economic Survey. An annual cross-sectional household survey, statistically representative of all districts in Indonesia. PodDes=Survei Potensi Desa, or Village Potential Survey: a periodic census of all villages in Indonesia. IPKM=Indeks Pembangunan Kesehatan Masyarakat or Population Health Development Index: Compound indicator of health status calculated at the district level, based on measures and responses collected at household level. MoH=Ministry of Health. RisKesDas=Riset Kesehatan Dasar, or Basic Health Research: a five-yearly household survey, statistically representative of all districts in Indonesia. BPJS=Badan Penyelenggara Jaminan Sosial Kesehatan, or Social Security Agency for Health. BPJS claims data reported by districts are collated at the national level. BPS=Badan Pusat Statistik or National Statistics Agency, also called Statistics Indonesia.
