# Supplementary material for: Is Indonesia achieving universal health coverage? Secondary analysis of national data on insurance coverage, health spending and service availability
Source: PubMed Central journal article supplement — BMJ Open. 2021 Oct 3;11(10):e050565. doi: 10.1136/bmjopen-2021-050565 (PMC8491299; doi:10.1136/bmjopen-2021-050565), 2021-10-03
Supplement: bmjopen-2021-050565supp002.pdf [file bmjopen-2021-050565supp002.pdf]

Supplementary material to Pratiwi et al.

Supplementary file 2: Steps taken to integrate data

## Supplementary file 2: Steps taken to integrate data from different sources

| Data types processed                | Operation                                                                                                                                         | Output                                                                      |
|-------------------------------------|---------------------------------------------------------------------------------------------------------------------------------------------------|-----------------------------------------------------------------------------|
| All                                 | Within each data type, generate variables needed for analysis, and standardise variables needed for merge.                                        | Coded dataset for each data type                                            |
| SUSENAS                             | Using weighted data,<br>1) collapse continuous variables to district/province/regional levels<br>2) collapse categorical variables. Merge 1) & 2) | 3 SUSENAS datasets: district, region, province                              |
| PoDes                               | Collapse to district, provincial and regional levels as above                                                                                     | 3 PoDes datasets: district, region, province                                |
| IPKM, BPJS                          | Collapse to provincial and regional levels                                                                                                        | 3 IPKM and 3 BPJS datasets: district, region, province                      |
| All collapsed                       | Merge all same-level datasets on geographic identifier                                                                                            | Full datasets for district, province and region                             |
| Full district and province datasets | Merge in shape files for mapping on geographic identifier                                                                                         | Full 2018 (BPJS 2017) datasets for district and province, with mapping data |
| SUSENAS                             | Merge district-level indicators from other datasets back into individual records                                                                  | Full individual level dataset                                               |

SUSENAS=National Social and Economic Survey. PoDes=Village Potential Survey. IPKM=Population Health Development Index. BPJS=Social Security Agency for Health.
