# Supplementary material for: Is Indonesia achieving universal health coverage? Secondary analysis of national data on insurance coverage, health spending and service availability
Source: PubMed Central journal article supplement — BMJ Open. 2021 Oct 3;11(10):e050565. doi: 10.1136/bmjopen-2021-050565 (PMC8491299; doi:10.1136/bmjopen-2021-050565), 2021-10-03

Supplementary material to Pratiwi et al.

Supplementary file 4: Provincial health need vs symptoms

### Supplementary file 4: Health needs index compared with self-reported symptoms, Indonesian provinces, 2018

This graph compares the provincial index of health need (RisKesDas excluding service access) with the prevalence of self-reported symptoms in the previous month from SUSENAS household-level data at the provincial level. Provinces with the best health status score lower on the health needs index.

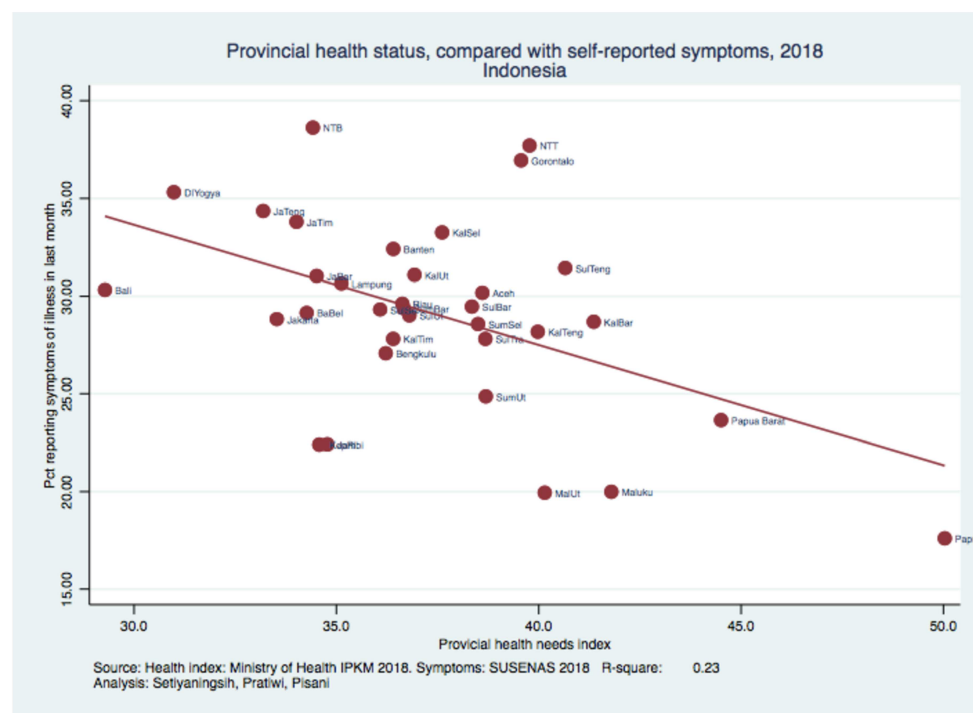

Supplement: bmjopen-2021-050565supp004.pdf [file bmjopen-2021-050565supp004.pdf]
