# Supplementary material for: Is Indonesia achieving universal health coverage? Secondary analysis of national data on insurance coverage, health spending and service availability
Source: PubMed Central journal article supplement — BMJ Open. 2021 Oct 3;11(10):e050565. doi: 10.1136/bmjopen-2021-050565 (PMC8491299; doi:10.1136/bmjopen-2021-050565), 2021-10-03
Supplement: bmjopen-2021-050565supp005.pdf [file bmjopen-2021-050565supp005.pdf]

Supplementary material to Pratiwi et al.

Supplementary file 5: percent insurance ownership, self-reported

[Supplementary file 5: Indonesian districts, self-reported insurance coverage by quintile of household non-health consumption, 2018](#)

Each individual in the household is asked whether they have insurance, and which type of insurance they have. Individuals can report more than one type of coverage; here we show only the most generous source of coverage.

Consumption is calculated at the household level. As a proxy for wealth, we sum all non-health-related consumption, and divide it by the number of individuals in the household. This table shows health insurance status by quintiles of wealth.

Source: SUSENAS 2018

|               | Uninsured | Subsidised JKN | Independent JKN | Private insurance |
|---------------|-----------|----------------|-----------------|-------------------|
| Lowest 20%    | 42.43     | 51.76          | 5.26            | 0.54              |
| Q2            | 41.21     | 48.34          | 9.01            | 1.43              |
| Middle 20%    | 38.97     | 44.68          | 13.56           | 2.79              |
| Q4            | 35.00     | 39.35          | 21.15           | 4.51              |
| Highest 20%   | 26.85     | 25.77          | 36.77           | 10.61             |
| All, National | 35.9      | 40.35          | 19.15           | 4.6               |
