# Supplementary material for: Is Indonesia achieving universal health coverage? Secondary analysis of national data on insurance coverage, health spending and service availability
Source: HighWire-hosted journal article supplement (doi:10.1136/bmjopen-2021-050565), 2021-10-01

Supplementary material to Pratiwi et al.

Supplementary file 6: Insurance claims vs OOP health spending

### Supplementary file 6: Out of pocket spending on health compared with insurance claims per capita, Indonesian provinces, 2018

This graph compares the median out of pocket spending on health per capita reported for the year to March 2018 (SUSENAS data) with the per capita public insurance claims for each Indonesian province for calendar 2017. Per capita insurance claims are calculated by summing up all inpatient and outpatient claims to the insurer, and dividing by the provincial population (BPJS). Rupiah totals are converted to US Dollars at the average Bank Indonesia rate for 2017 (US\$1 = IDR 13,384) for BPJS data, and the average rate for March 2018 (US\$1= IDR 13,760) for SUSENAS data.

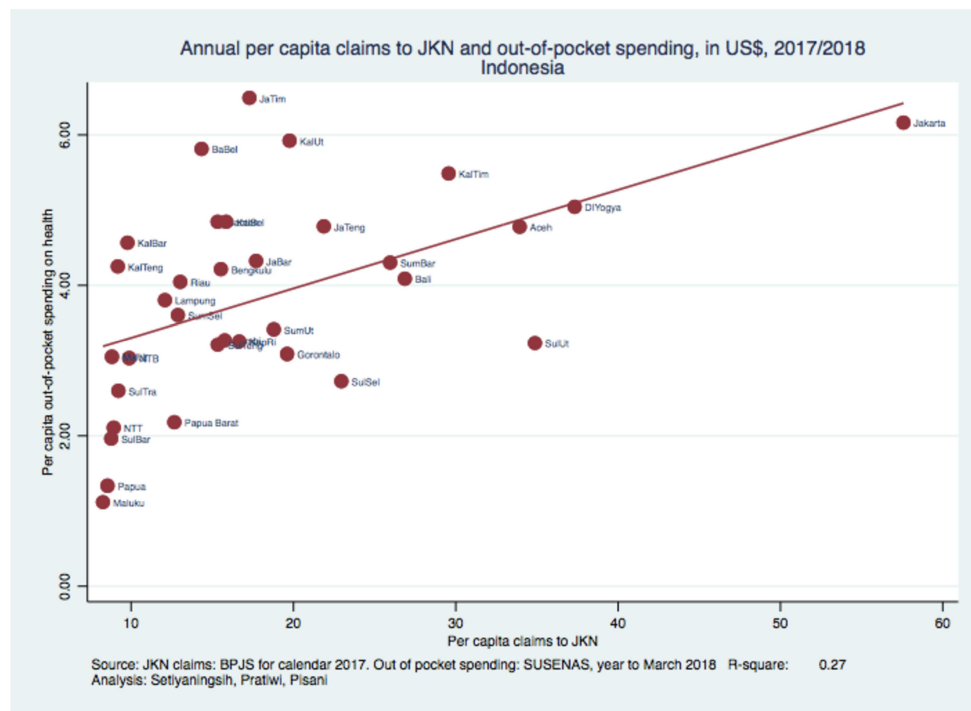

Supplement: bmjopen-2021-050565supp006_data_supplement.pdf [file bmjopen-2021-050565supp006_data_supplement.pdf]
