# Supplementary material for: Is Indonesia achieving universal health coverage? Secondary analysis of national data on insurance coverage, health spending and service availability
Source: PubMed Central journal article supplement — BMJ Open. 2021 Oct 3;11(10):e050565. doi: 10.1136/bmjopen-2021-050565 (PMC8491299; doi:10.1136/bmjopen-2021-050565), 2021-10-03
Supplement: bmjopen-2021-050565supp007.pdf [file bmjopen-2021-050565supp007.pdf]

Supplementary material to Pratiwi et al.

Supplementary file 7: Relative value of key indicators

## Supplementary file 7 : Relative value of key indicators relating to inpatient services, by Indonesian region, 2018

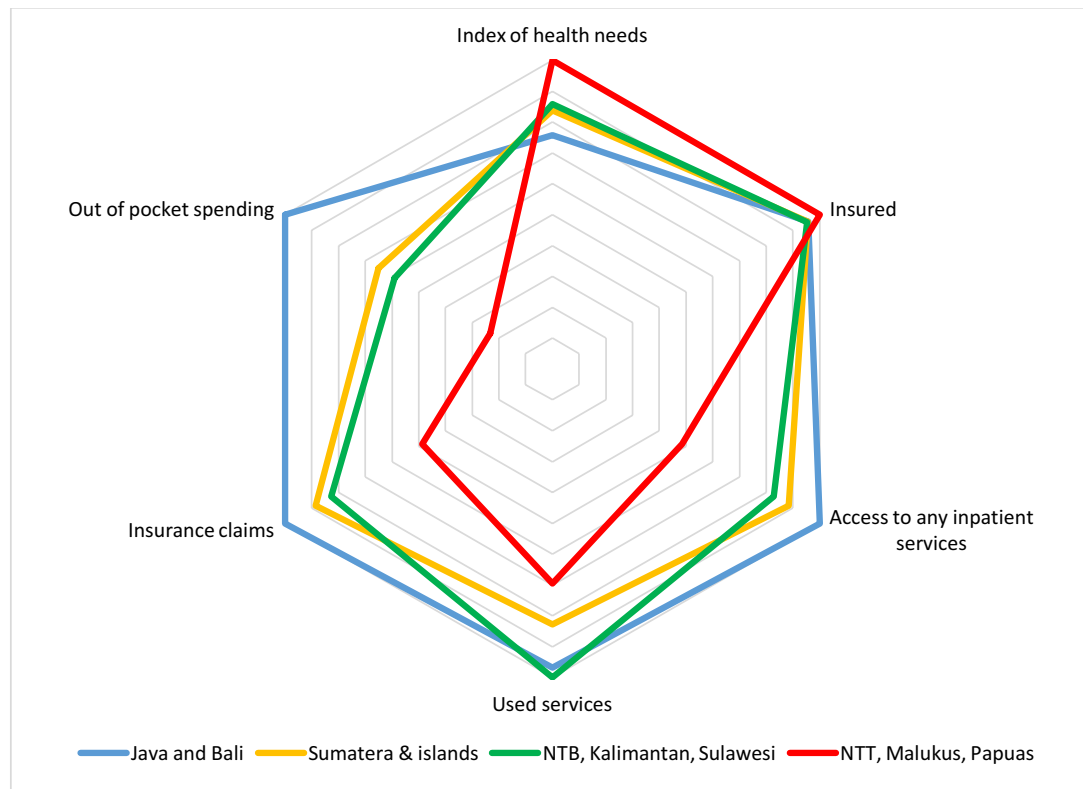

Used services: % of individuals using inpatient services in the last year. Access to any inpatient services: % of villages with easy access to hospital or primary care with inpatient services. Insured: % of individuals reporting any current health insurance. Out of pocket spending: Median value of (household spending on inpatient services in the last year, divided by the number of household members reporting inpatient care in the last year). Insurance claims: Total claims to public insurer for inpatient and outpatient care, divided by total registered participants.
